# Supplementary material
Source: PubMed Central journal article supplement (PMC6632122)
Supplement: jamapediatr-173-853-s001.pdf [file jamapediatr-173-853-s001.pdf]

## Supplementary Online Content

Boers E, Afzali MH, Newton N, Conrod P. Association of screen time and depression in adolescence. *JAMA Pediatr*. Published online July 15, 2019.  
doi:10.1001/jamapediatrics.2019.1759

**eTable.** Means and standard deviations for the main variables for each cohort

This supplementary material has been provided by the authors to give readers additional information about their work.

**eTable.** Means and standard deviations for the main variables for each cohort

|                     | <b>Year 1 (M, SD)</b> | <b>Year 2 (M, SD)</b> | <b>Year 3 (M, SD)</b> | <b>Year 4 (M, SD)</b> |
|---------------------|-----------------------|-----------------------|-----------------------|-----------------------|
| <b>Depression</b>   | 4.29, 5.10            | 4.75, 5.64            | 5.32, 5.98            | 5.45, 5.93            |
| <b>Social Media</b> | 0.94, 1.25            | 1.13, 1.30            | 1.24, 1.27            | 1.44, 1.26            |
| <b>Television</b>   | 1.52, 1.16            | 1.55, 1.20            | 1.59, 1.20            | 1.61, 1.24            |
| <b>Video Gaming</b> | 1.34, 1.30            | 1.44, 1.39            | 1.42, 1.41            | 1.36, 1.44            |
| <b>Computer use</b> | 0.60, 1.03            | 0.60, 1.02            | 0.58, 1.00            | 0.62, 1.05            |
| <b>Self-esteem</b>  | 20.22, 5.55           | 20.34, 5.72           | 20.40, 5.66           | 20.45, 5.53           |
| <b>Exercise</b>     | 2.93, 1.32            | 2.24, 0.49            | 1.79, 0.98            | 1.67, 0.59            |

Note: exercise is measure of exercise frequency per week.
